# Supplementary material for: Gelatin Enhances the Wet Mechanical Properties of Poly(D,L-Lactic Acid) Membranes
Source: MDPI journal article supplement (doi:10.3390/ijms25095022), 2024-05-04
Supplement: s1 [file s1]

# Support Information of: Gelatin Enhances the Wet Mechanical Properties of Poly(D,L-Lactic Acid) Membranes

Deuk Yong Lee <sup>1,2,\*</sup>

<sup>1</sup> Department of Biomedical Engineering, Daelim University, Anyang 13916, Korea; duke1208@gmail.com (D.Y.L.)

<sup>2</sup> Department of R&D Center, Hass Co., Ltd., Gwangmyeong 14322, Korea; duke1208@gmail.com (D.Y.L.)

\* Correspondence: duke1208@gmail.com (D.Y.L.)

Supporting Figures:

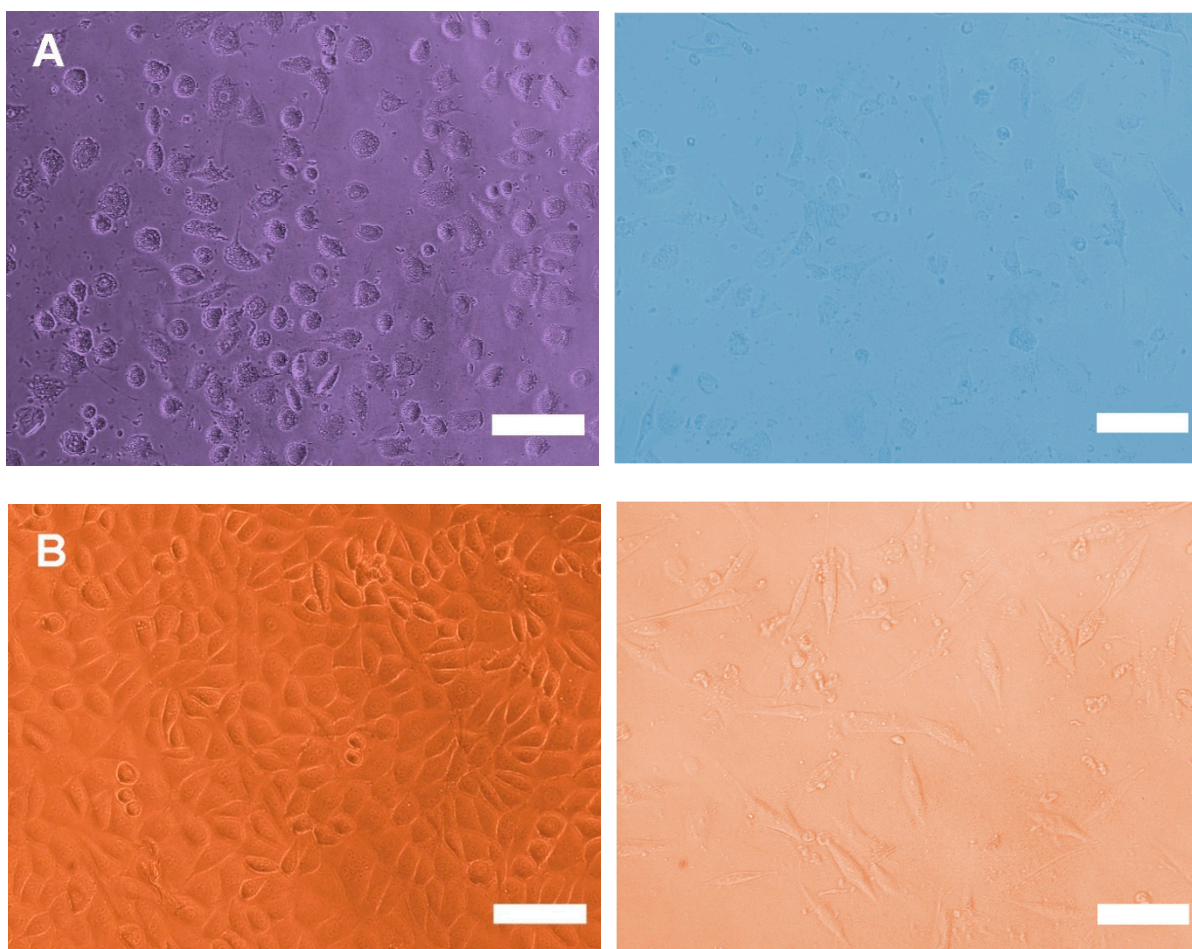

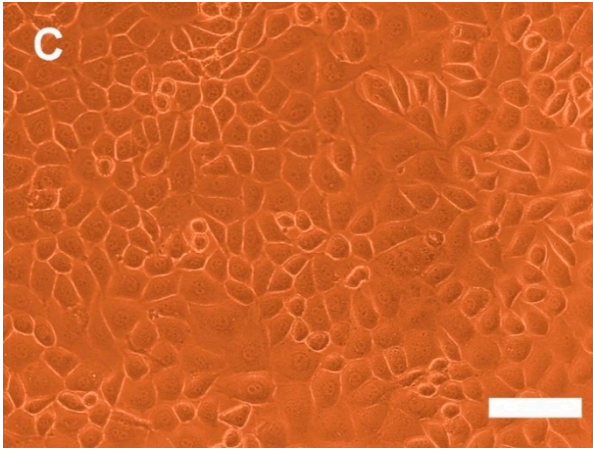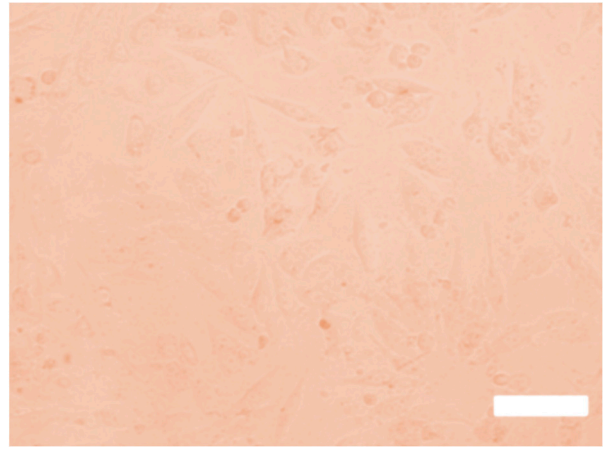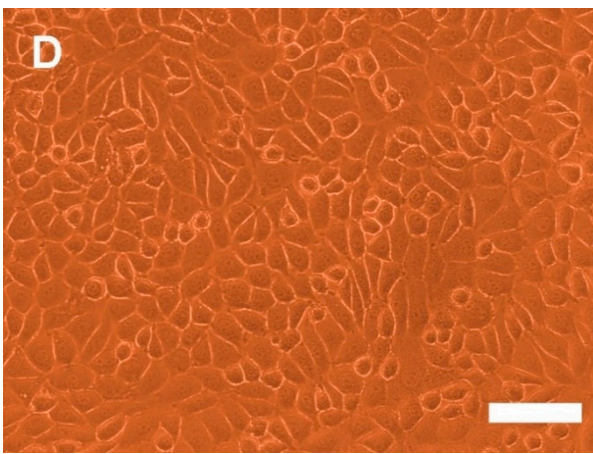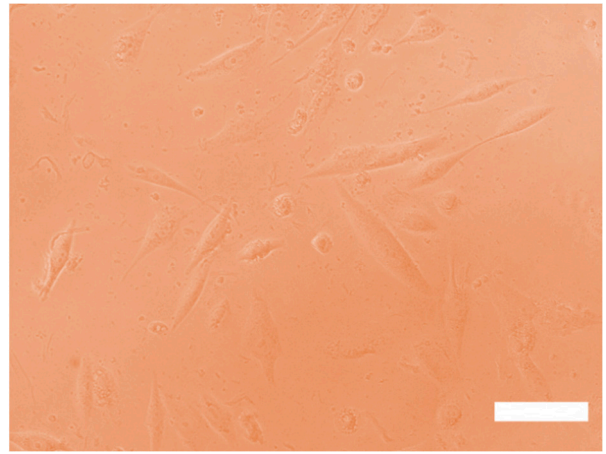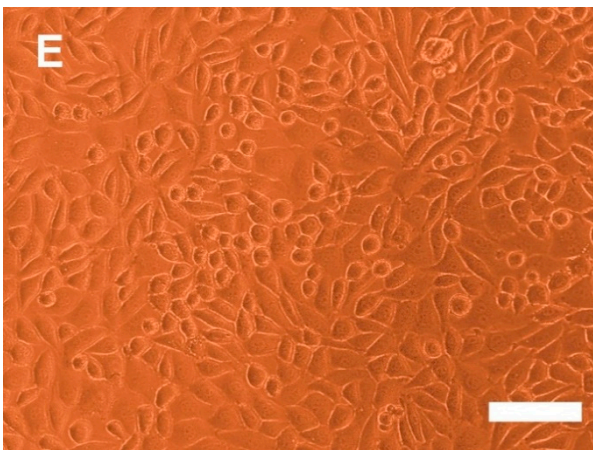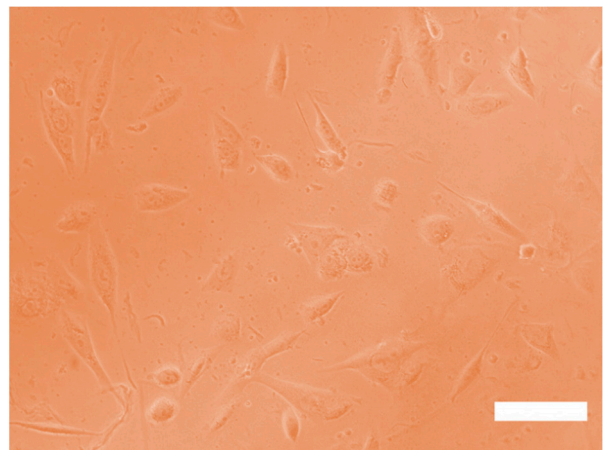



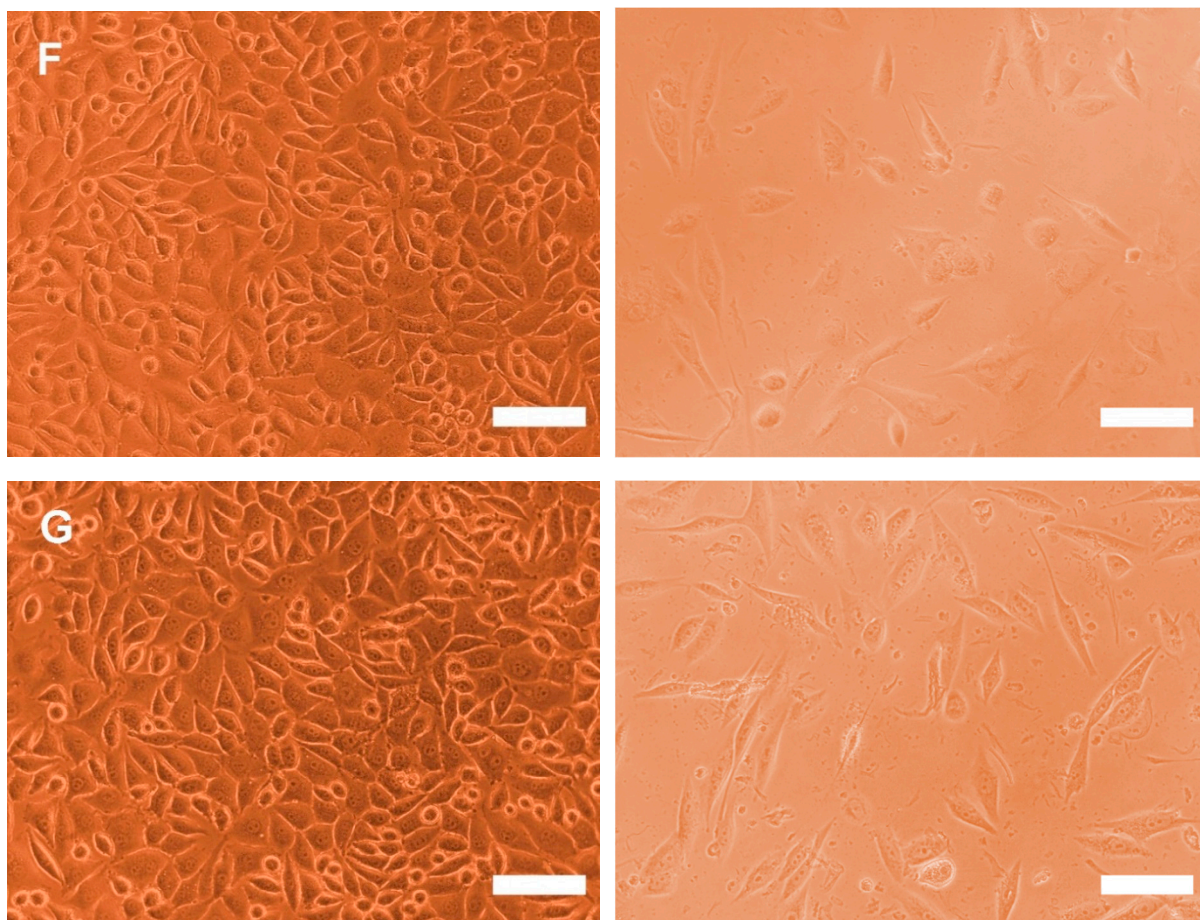

**Figure S1.** Photographs of L-929 and MG-63 cell morphology: **A** positive control, **B** negative control, and the extracts of poly(D,L-lactic acid)/gelatin membranes as a function of gelatin concentration: **C** 0%, **D** 10%, **E** 20%, **F** 30%, and **G** 40% from EZ-cytox after exposure to the membrane suspensions for 48 h. Scale bar = 100  $\mu$ m.

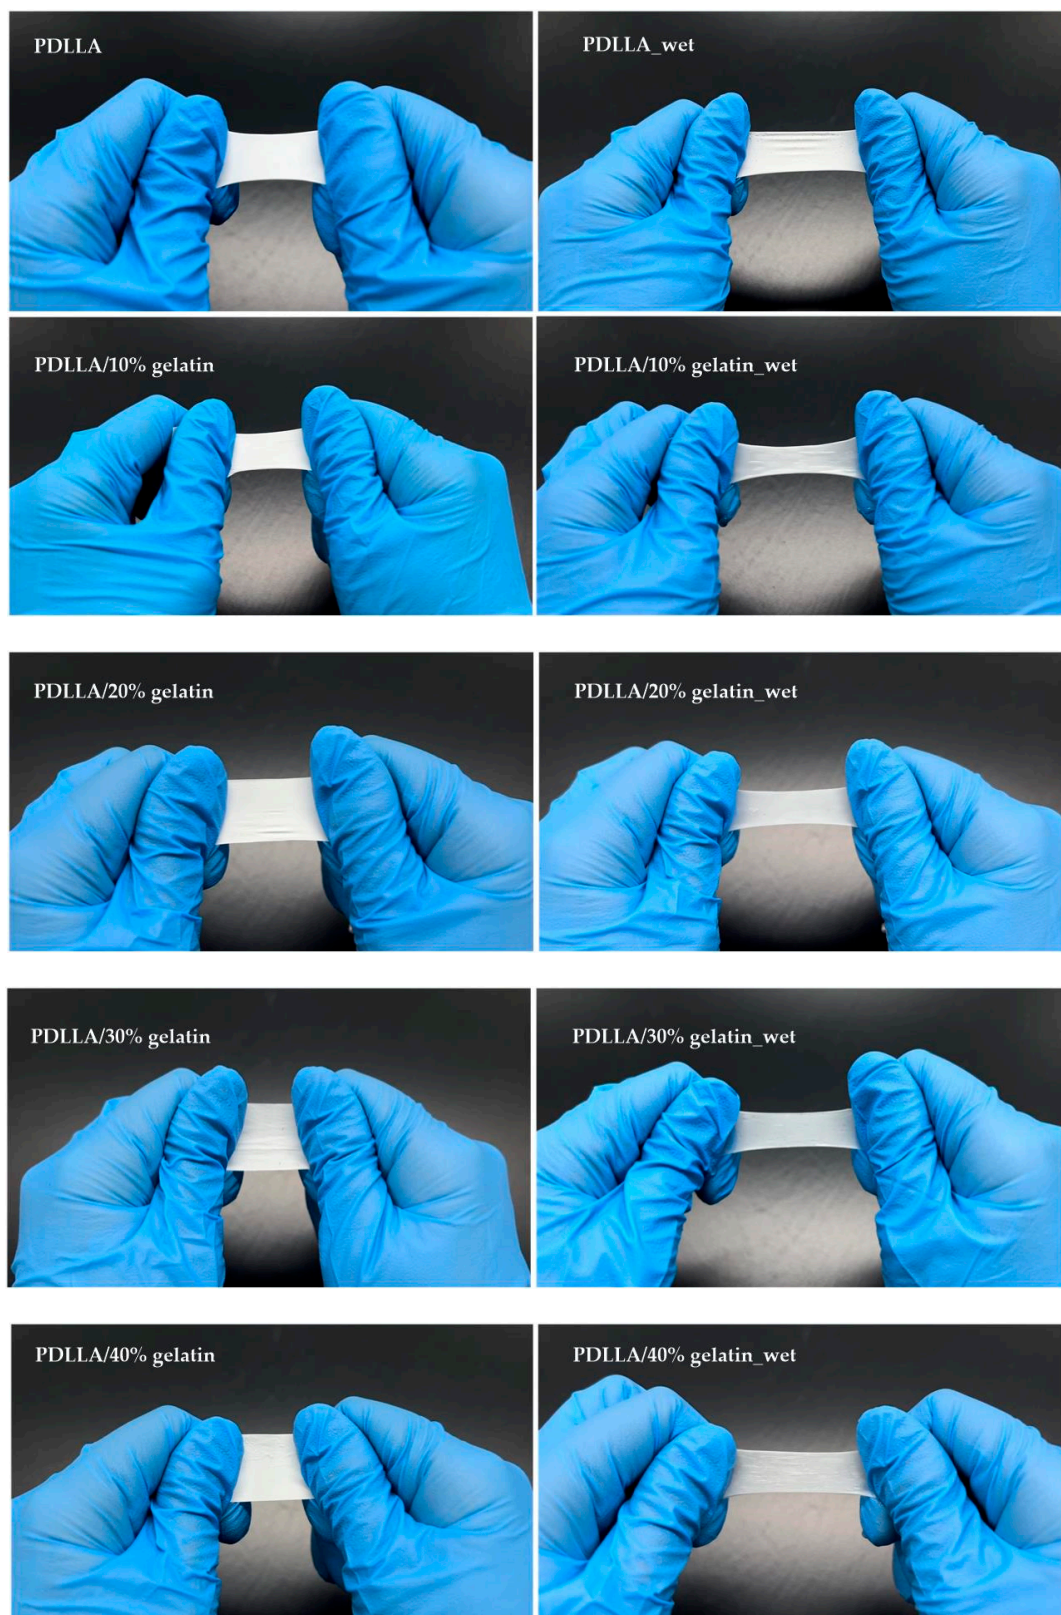

**Figure S2.** Finger-stretched optical photographs of various poly(D,L-lactic acid)/gelatin membranes in dry and wet conditions.

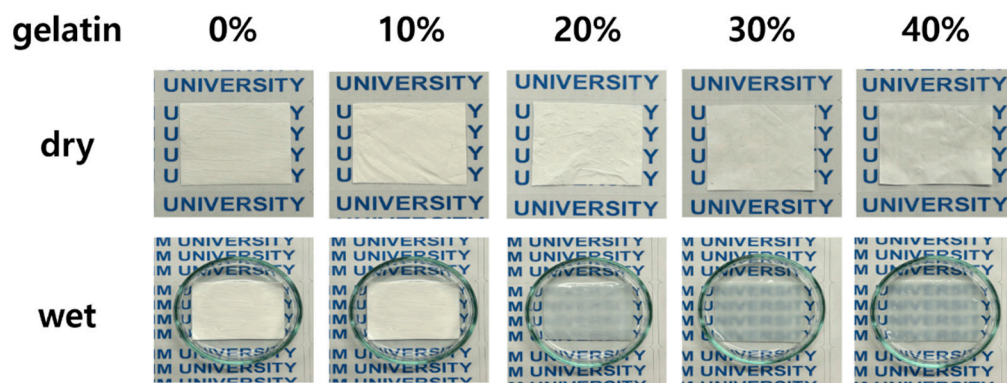

**Figure S3.** Photographs of poly(D,L-lactic acid)/gelatin membranes with varying gelatin contents in dry and wet states.
